# Supplementary material for: A high-performance self-powered photodetector based on a concentric annular α-FAPbI3/MAPbI3single crystal lateral heterojunction with broadband detectivity
Source: Royal Society of Chemistry journal article supplement (doi:10.1039/d2tc02686d), 2022-01-01
Supplement: d2tc02686d1.pdf [file d2tc02686d1.pdf]

*Supporting Information*

**High-performance Self-powered Photodetector Based on Concentric Annular  $\alpha$ -  
FAPbI<sub>3</sub>/MAPbI<sub>3</sub> Single Crystals Lateral Heterojunction with Broadband  
Detectivity**

Hu Zhang <sup>a</sup>, Zhiliang Chen <sup>\*abc</sup>, Yanhui Li <sup>a</sup>, Jianfeng Yao <sup>a</sup>, Duanwangde Liu <sup>a</sup>, Wei Zeng <sup>a</sup>, Pengbin Gui <sup>a</sup>, Zhixiang Huang <sup>\*ac</sup>

<sup>a</sup> Information Materials and Intelligent Sensing Laboratory of Anhui Province, Anhui University, No. 111 Jiulong Road, Hefei, Anhui Province, People's Republic of China.

<sup>b</sup> Anhui Province Key Laboratory of Target Recognition and Feature Extraction, Lu'an, Anhui Province, People's Republic of China.

<sup>c</sup> Hefei Comprehensive National Science Center, Hefei 230601, Anhui, People's Republic of China

\*Corresponding authors: Zhixiang Huang (zxhuang@ahu.edu.cn) and Zhiliang Chen (zhiliang.chen@ahu.edu.cn)

To obtain FAPbI<sub>3</sub> single crystals, a concentration of 1.2 M is chosen in present work, then the proper temperature range for crystal growth should be carefully considered. The solubility curve of FAPbI<sub>3</sub> in  $\gamma$ -GBL is tested as following figure. In order to obtain FAPbI<sub>3</sub> single crystals via inverse temperature crystallization, the temperature should be at least  $\sim 65^\circ\text{C}$ . To obtain FAPbI<sub>3</sub> single crystal seeds in a shorter time, we choose  $105^\circ\text{C}$  for growth temperature of FAPbI<sub>3</sub> single crystal seeds. However, after obtaining FAPbI<sub>3</sub> single crystal seeds, the temperature should be lower than  $105^\circ\text{C}$  but higher than  $65^\circ\text{C}$  for subsequent quality FAPbI<sub>3</sub> single crystal wafer growth. In our work, we found the temperature values ranging from  $75^\circ\text{C}$  to  $85^\circ\text{C}$  is proper. For liquid phase epitaxy of MAPbI<sub>3</sub> single crystal, the same solvent ( $\gamma$ -GBL) and concentration (1.2 M) are chosen, while the temperature is ranging from  $88^\circ\text{C}$  to  $95^\circ\text{C}$ .

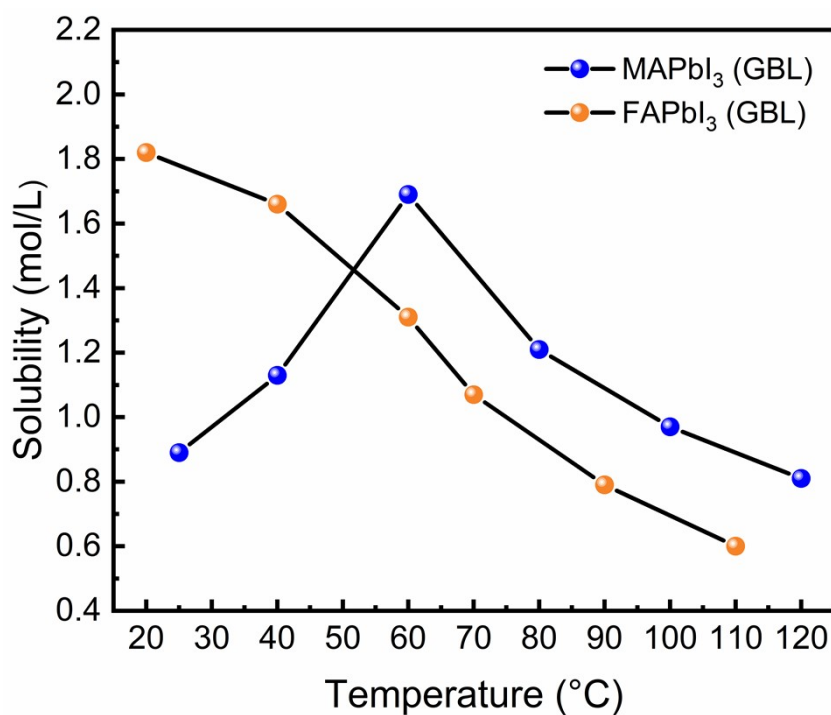

**Fig. S1** The solubility of FAPbI<sub>3</sub> and MAPbI<sub>3</sub> in  $\gamma$ -GBL.

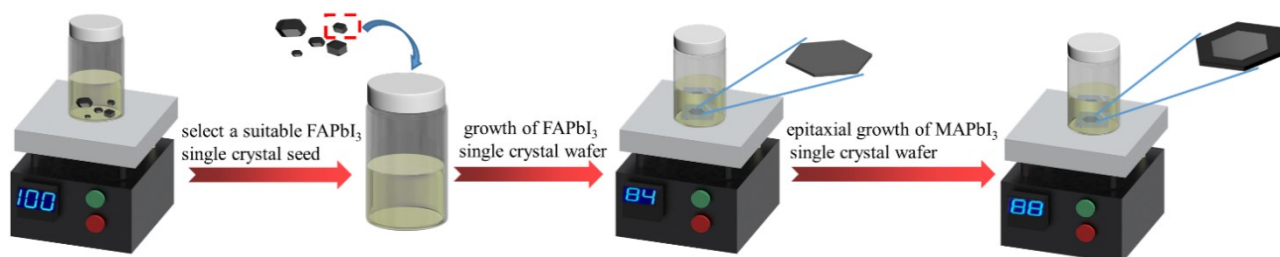

**Fig. S2** Flow diagram of epitaxial growth of FAPbI<sub>3</sub>/MAPbI<sub>3</sub> SCs concentric annular lateral heterojunction.

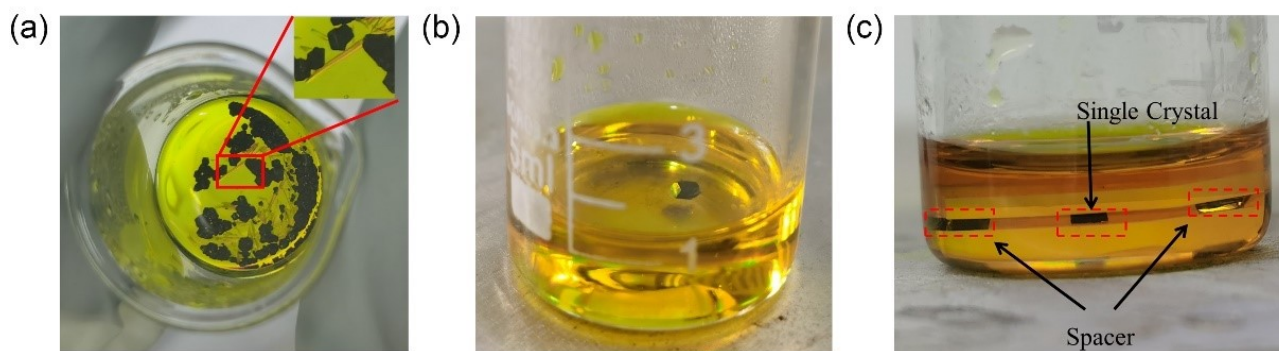

**Fig. S3** Grow FAPbI<sub>3</sub> SC a) without using the seeds, the inset shows needle-like yellow  $\delta$ -FAPbI<sub>3</sub> perovskites. b) using the seeds. c) using the SCITC method.

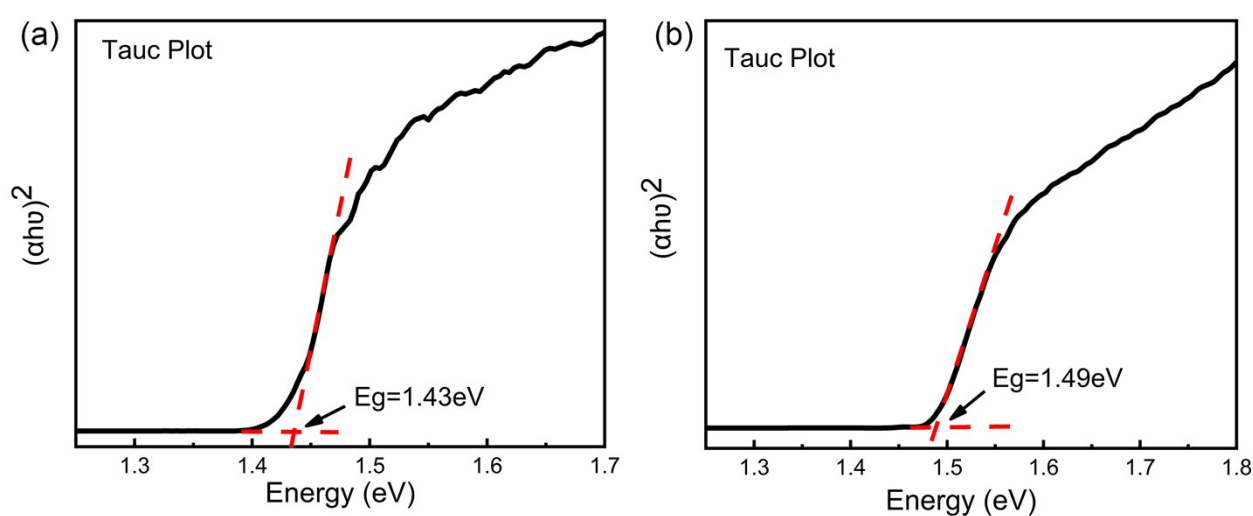

**Fig. S4** Tauc plots of c) FAPbI<sub>3</sub> SC and d) MAPbI<sub>3</sub> SC obtained from their absorbance spectra.

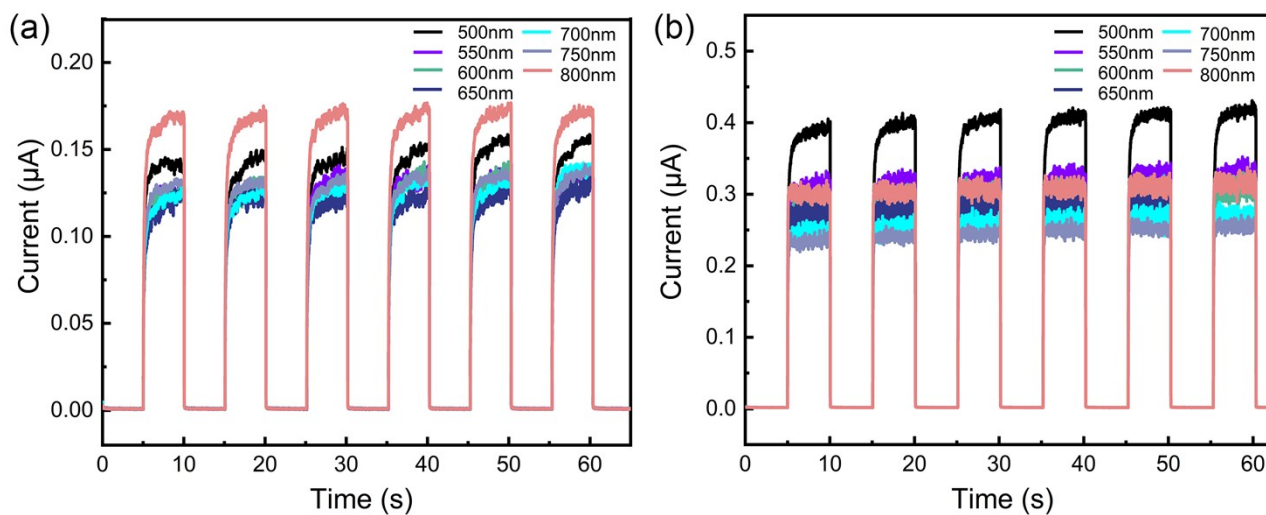

**Fig. S5** Time-dependent photoresponse under light illumination ( $0.19 \text{ mW cm}^{-2}$ ) ranging from 500 nm to 800 nm at a) -1 V bias. b) -2 V bias.

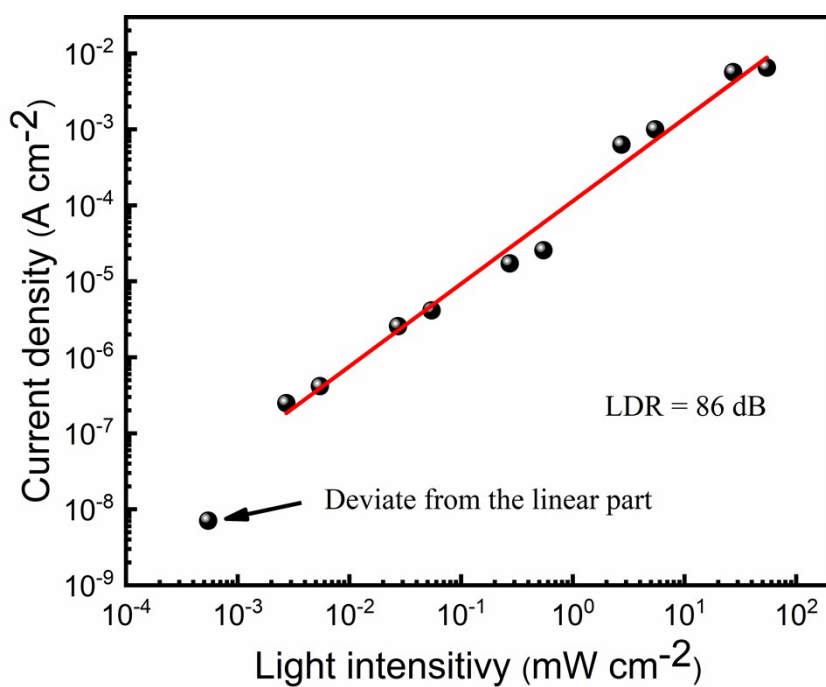

**Fig. S6** LDR of the device tested under 530 nm illumination at a bias of -3 V.

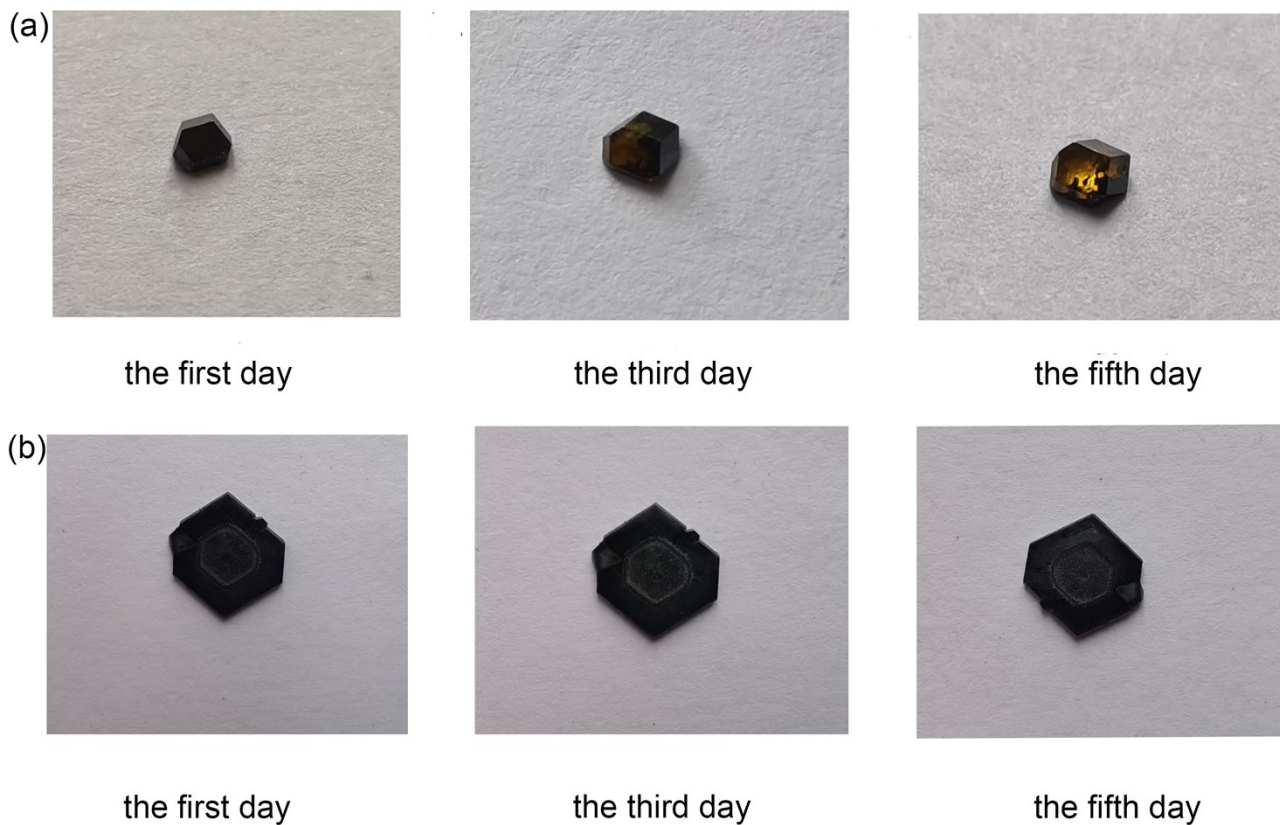

**Fig. S7** Comparison of stability between pristine FAPbI<sub>3</sub> SC and  $\alpha$ -FAPbI<sub>3</sub>/MAPbI<sub>3</sub> SC lateral heterojunction.

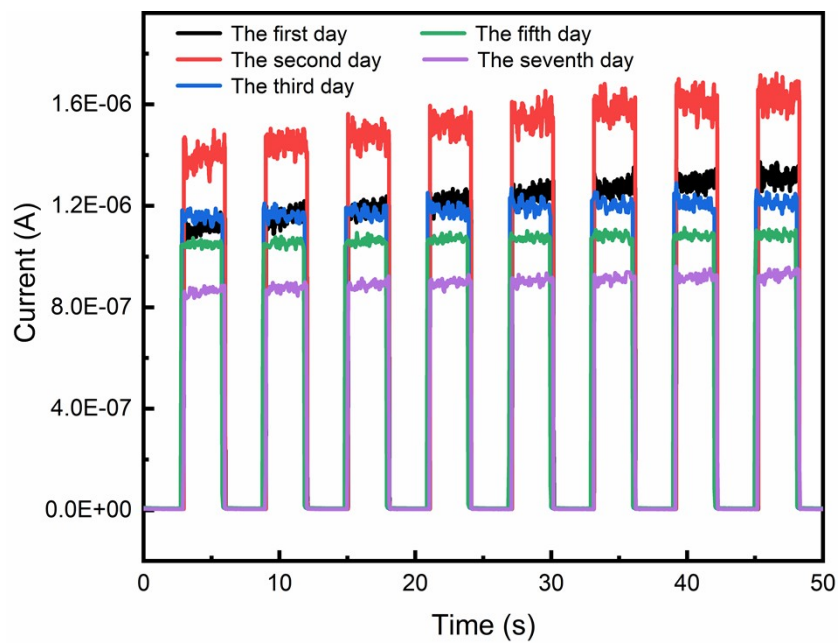

**Fig. S8** The stability test of the unencapsulated device.

**Table S1** Parameters of perovskites

| Species             | Lattice constant       | Band gap                | Crystal system |
|---------------------|------------------------|-------------------------|----------------|
| FAPbI <sub>3</sub>  | 6.40 Å <sup>[1]</sup>  | 1.43 eV                 | cubic          |
| FAPbBr <sub>3</sub> | 6.03 Å <sup>[2]</sup>  | 2.26 eV <sup>[3]</sup>  | cubic          |
| FAPbCl <sub>3</sub> | 6.2 Å <sup>[4]</sup>   | 2.84 eV <sup>[4]</sup>  | cubic          |
| MAPbI <sub>3</sub>  | 6.276 Å <sup>[5]</sup> | 1.49 eV                 | cubic          |
| MAPbBr <sub>3</sub> | 5.872 Å <sup>[6]</sup> | 2.3 eV <sup>[7]</sup>   | cubic          |
| MAPbCl <sub>3</sub> | 5.7 Å <sup>[8]</sup>   | 2.85 eV <sup>[9]</sup>  | cubic          |
| CsPbI <sub>3</sub>  | 6.18 Å <sup>[10]</sup> | 1.67 eV <sup>[11]</sup> | cubic          |
| CsPbBr <sub>3</sub> | 5.87 Å <sup>[12]</sup> | 2.25 eV <sup>[13]</sup> | cubic          |
| CsPbCl <sub>3</sub> | 5.61 Å <sup>[14]</sup> | 3.1 eV <sup>[15]</sup>  | cubic          |

The lattice misfits can be calculated by the following formula:

$$f(\text{epitaxial layer, substrate}) = [a(\text{epitaxial layer}) - a(\text{substrate})] / a(\text{substrate})$$

Where  $a(\text{epitaxial layer})$  is the lattice constant of epitaxial layer,  $a(\text{substrate})$  is the lattice constant of substrate, so the lattice misfits between different kinds of perovskites are calculated as follows:

$$f(\text{FAPbBr}_3, \text{FAPbI}_3) = -5.78,$$

$$f(\text{FAPbCl}_3, \text{FAPbI}_3) = -3.13,$$

$$f(\text{MAPbI}_3, \text{FAPbI}_3) = -1.94,$$

$$f(\text{MAPbBr}_3, \text{FAPbI}_3) = -8.25,$$

$$f(\text{MAPbCl}_3, \text{FAPbI}_3) = -10.94,$$

$$f(\text{CsPbI}_3, \text{FAPbI}_3) = -3.44,$$

$$f(\text{CsPbBr}_3, \text{FAPbI}_3) = -8.28,$$

$$f(\text{CsPbCl}_3, \text{FAPbI}_3) = -12.34,$$

$$f(\text{FAPbI}_3, \text{MAPbI}_3) = 1.98,$$

$$f(\text{FAPbBr}_3, \text{MAPbI}_3) = -3.92,$$

$$f(\text{FAPbCl}_3, \text{MAPbI}_3) = -1.21,$$

$$f(\text{MAPbBr}_3, \text{MAPbI}_3) = -6.44,$$

$$f(\text{MAPbCl}_3, \text{MAPbI}_3) = -9.18,$$

$$f(\text{CsPbI}_3, \text{MAPbI}_3) = -1.53,$$

$$f(\text{CsPbBr}_3, \text{MAPbI}_3) = -6.47,$$

$$f(\text{CsPbCl}_3, \text{MAPbI}_3) = -10.61.$$

**Table S2** Performance comparison of perovskite-based photodetectors

| Material structure                                    | Light wavelength (nm)/power                        | R (mA W <sup>-1</sup> ) |
|-------------------------------------------------------|----------------------------------------------------|-------------------------|
| MAPbI <sub>3</sub> microwires/Graphene                | 520 nm/13.5 mW cm <sup>-2</sup>                    | 2.2                     |
| CsPbI <sub>3</sub> -CsPbBr <sub>3</sub> anowire Array | 650 nm/0.5 μW cm <sup>-2</sup>                     | 125                     |
| MAPbBr <sub>3</sub> /Graphene                         | 532 nm/0.66 mW cm <sup>-2</sup>                    | 1.017 × 10 <sup>6</sup> |
| CsPbBr <sub>3</sub> Monocrystalline Films             | 530 nm/216 μW cm <sup>-2</sup>                     | –                       |
| CsPbBr <sub>3</sub> /CuI                              | 540 nm/216 μW cm <sup>-2</sup>                     | 1.4                     |
| MAPbICl <sub>2</sub> /TiO <sub>2</sub> /Si            | 800 nm/1.13 × 10 <sup>-4</sup> mW cm <sup>-2</sup> | 870                     |

  

| D* (Jones)              | Response speed                                   | Ref. |
|-------------------------|--------------------------------------------------|------|
| 1.78 × 10 <sup>5</sup>  | T <sub>r</sub> =0.068 s                          | [16] |
| –                       | T <sub>r</sub> =0.7 ms, T <sub>d</sub> =0.8 ms   | [17] |
| 2.02 × 10 <sup>13</sup> | T <sub>r</sub> =50.9 ms, T <sub>d</sub> =26.0 ms | [18] |
| –                       | T <sub>r</sub> =0.4 ms, T <sub>d</sub> = 9 ms    | [19] |
| 6.2 × 10 <sup>10</sup>  | T <sub>r</sub> =0.04 ms, T <sub>d</sub> =2.96 ms | [20] |
| 6 × 10 <sup>12</sup>    | T <sub>r</sub> =116 ms, T <sub>d</sub> =50 ms    | [21] |

## References

- [1] L. Qiao, X. Sun and R. Long, *J. Phys. Chem. Lett.*, 2019, **10**, 672.
- [2] M. Ng and J. E. Halpert, *RSC Adv.*, 2020, **10**, 3832.
- [3] N. Arora, M. I. Dar, M. Abdi-Jalebi, F. Giordano, N. Pellet, G. Jacopin, R. H. Friend, S. M. Zakeeruddin and M. Gratzel, *Nano Lett.*, 2016, **16**, 7155.
- [4] S. Pachori, R. Agarwal, A. Shukla, U. Rani and A. S. Verma, *Int. J. Quantum Chem.*, 2021, **121**, e26671.
- [5] T. Baikie, Y. Fang, J. M. Kadro, M. Schreyer, F. Wei, S. G. Mhaisalkar, M. Graetzel and T. J. White, *J. Mater. Chem. A*, 2013, **1**, 5628.
- [6] L. Zhang, L. Liu, P. Zhang, R. Li, G. Zhang and X. Tao, *ACS Appl. Mater. Interfaces*, 2020, **12**, 39834.
- [7] F. Babbe and C. M. Sutter-Fella, *Adv. Energy Mater.*, 2020, **10**, 1903587.
- [8] A. Osherov, Y. Feldman, I. Kaplan-Ashiri, D. Cahen, G. Hodes and *Chem. Mater.*, 2020, **32**, 4223.
- [9] Z. Yuan, W. Huang, S. Ma, G. Ouyang, W. Hu, W. Zhang and *J. Mater. Chem. C*, 2019, **7**, 5442.
- [10] G. Yuan, S. Qin, X. Wu, H. Ding and A. Lu, *Phase Transitions*, 2017, **91**, 38.
- [11] K. Wang, D. Yang, C. Wu, M. Sanghadasa and S. Priya, *Prog. Mater. Sci.*, 2019, **106**, 100580.
- [12] S. Liu, A. R. DeFilippo, M. Balasubramanian, Z. Liu, S.G. Wang, Y.-S. Chen, S. Chariton, V. Prakapenka, X. Luo, L. Zhao, J. S. Martin, Y. Lin, Y. Yan, S. K. Ghose and T. A. Tyson, *Adv. Sci.*, 2021, **8**, 2003046.
- [13] P. Zhang, G. Zhang, L. Liu, D. Ju, L. Zhang, K. Cheng and X. Tao, *J. Phys. Chem. Lett.*, 2018, **9**, 5040.



- [14] M. Naseri, D. M. Hoat, R. Ponce-Pérez, J. F. Rivas-Silva and G. H. Coccoletzi, *Chem. Phys.*, 2020, **531**, 110654.
- [15] Q. Yao, J. Zhang, K. Wang, L. Jing, X. Cheng, C. Shang, J. Ding, W. Zhang, H. Sun and T. Zhou, *J. Mater. Chem. C*, 2021, **9**, 7374.
- [16] J. Ding, H. Fang, Z. Lian, Q. Lv, J. L. Sun and Q. Yan, *Nanoscale*, 2018, **10**, 10538.
- [17] M. Wang, W. Tian, F. Cao, M. Wang and L. Li, *Adv. Funct. Mater.*, 2020, **30**, 1909771.
- [18] Y. Zou, T. Zou, C. Zhao, B. Wang, J. Xing, Z. Yu, J. Cheng, W. Xin, J. Yang, W. Yu, H. Dong and C. Guo, *Small*, 2020, **16**, 2000733.
- [19] Z. Yang, Q. Xu, X. Wang, J. Lu, H. Wang, F. Li, L. Zhang, G. Hu and C. Pan, *Adv. Mater.*, 2018, **30**, 1802110.
- [20] Y. Zhang, S. Li, W. Yang, M. K. Joshi and X. Fang, *J. Phys. Chem. Lett.*, 2019, **10**, 2400.
- [21] F. Cao, Q. Liao, K. Deng, L. Chen, L. Li and Y. Zhang, *Nano Res.*, 2018, **11**, 1722.
